# Supplementary material for: First Evidence of Co-Circulation of Emerging Leishmania martiniquensis, Leishmania orientalis, and Crithidia sp. in Culicoides Biting Midges (Diptera: Ceratopogonidae), the Putative Vectors for Autochthonous Transmission in Southern Thailand
Source: MDPI journal article supplement (doi:10.3390/tropicalmed7110379), 2022-11-15
Supplement: s1 [file s1]

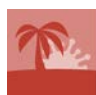

# Supplementary Materials for First Evidence of Co-Circulation of Emerging *Leishmania martiniquensis*, *Leishmania orientalis*, and *Crithidia* sp. in *Culicoides* Biting Midges (Diptera: Ceratopogonidae), the Putative Vectors for Autochthonous Transmission in Southern Thailand

**Table S1.** The BLASTn result of COI sequences obtained from representative samples of *Culicoides* Species in this study.

| No. | Sample ID | Accession No. | Morphological Identification | Top BLASTn Hits and % Similarity                       |
|-----|-----------|---------------|------------------------------|--------------------------------------------------------|
| 1.  | CNR10     | OP741195      | <i>C. huffi</i>              | <i>C. huffi</i> MLP218-11 (MZ191866), 96.20%           |
| 2.  | CSP18     | OP741196      | <i>C. peregrinus</i>         | <i>C. peregrinus</i> YYU_103 (KY433459), 99.52%        |
| 3.  | CSP20     | OP741197      | <i>C. peregrinus</i>         | <i>C. peregrinus</i> YYU_103 (KY433459), 100%          |
| 4.  | CSP28     | OP741198      | <i>C. peregrinus</i>         | <i>C. peregrinus</i> YYU_103 (KY433459), 100%          |
| 5.  | CSP35     | OP741199      | <i>C. oxystoma</i>           | <i>C. oxystoma</i> 87m045A211 (MW496264), 99.28%       |
| 6.  | CSP38     | OP741200      | <i>C. oxystoma</i>           | <i>C. oxystoma</i> O7 (MW496278), 99.52%               |
| 7.  | CSP50     | OP741201      | <i>C. oxystoma</i>           | <i>C. oxystoma</i> O8 (MW496279), 100%                 |
| 8.  | CSP51     | OP741202      | <i>C. oxystoma</i>           | <i>C. oxystoma</i> 13m042A26 (MW496246), 99.05%        |
| 9.  | CSP52     | OP741203      | <i>C. oxystoma</i>           | <i>C. oxystoma</i> 12m016A22 (MW496245), 99.29%        |
| 10. | CNR3      | OP741204      | <i>C. mahasarakhamense</i>   | <i>C. mahasarakhamense</i> MLP60-29 (MZ191855), 100%   |
| 11. | CNR4      | OP741205      | <i>C. mahasarakhamense</i>   | <i>C. mahasarakhamense</i> MLP60-29 (MZ191855), 100%   |
| 12. | CSP61     | OP741206      | <i>C. mahasarakhamense</i>   | <i>C. mahasarakhamense</i> MLP60-29 (MZ191855), 99.76% |
| 13. | CSP62     | OP741207      | <i>C. mahasarakhamense</i>   | <i>C. mahasarakhamense</i> MLP60-29 (MZ191855), 99.76% |
| 14. | CHH95     | OP741208      | <i>C. orientalis</i>         | <i>C. asiana</i> VNMC23 (MK760107), 99.76%             |
| 15. | CBF13     | OP741209      | <i>C. innoxius</i>           | <i>C. innoxius</i> G6 (MZ189956), 99.76%               |
| 16. | CBF18     | OP741210      | <i>C. innoxius</i>           | <i>C. innoxius</i> G6 (MZ189956), 99.76%               |
| 17. | CHH7      | OP741211      | <i>C. innoxius</i>           | <i>C. innoxius</i> G6 (MZ189956), 99.27%               |
| 18. | CHH26     | OP741212      | <i>C. innoxius</i>           | <i>C. innoxius</i> MLP251-31 (MZ191870), 100%          |
| 19. | CBF3      | OP741213      | <i>C. flaviscutatus</i>      | <i>C. sinanoensis</i> RUXX03 (MK760243), 87%           |
| 20. | CBF5      | OP741214      | <i>C. flaviscutatus</i>      | <i>C. sinanoensis</i> RUXX03 (MK760243), 87%           |
| 21. | CHH105    | OP741215      | <i>C. jacobsoni</i>          | <i>C. jacobsoni</i> G9 (MK189959), 100%                |
| 22. | CHH45     | OP741216      | <i>C. fulvus</i>             | <i>C. fulvus</i> ww08225 (KT352643), 100%              |
| 23. | CBF17     | OP741217      | <i>C. fulvus</i>             | <i>C. fulvus</i> ww08225 (KT352643), 100%              |
| 24. | CBF28     | OP741218      | <i>C. Trithecoides</i> sp.   | <i>Culicoides</i> sp. 3 YF-2021a G36 (MZ189973), 100%  |
| 25. | CBF42     | OP741219      | <i>C. Trithecoides</i> sp.   | <i>C. tropicalis</i> CIRAD:ZA.21 (MF399798), 85.20%    |

**Table S2.** The BLASTn result of *Leishmania* ITS1 sequences amplified from field-caught *Culicoides* biting midges in this study.

| No. | Location                            | Accession no. | Parasite Identification  | Isolate | Host Species         | Top BLASTn Matches and % Similarity                      |
|-----|-------------------------------------|---------------|--------------------------|---------|----------------------|----------------------------------------------------------|
| 1.  | Sadao/1 <sup>st</sup> patient house | OP698051      | <i>L. martiniquensis</i> | CNR10   | <i>C. huffi</i>      | <i>L. martiniquensis</i> 770605_Trang (KY982650), 98.84% |
| 2.  | Sadao/2 <sup>nd</sup> patient house | OP698052      | <i>L. martiniquensis</i> | CSP2    | <i>C. peregrinus</i> | <i>L. martiniquensis</i> 770605_Trang (KY982650), 100%   |
| 3.  | Sadao/2 <sup>nd</sup> patient house | OP698053      | <i>L. martiniquensis</i> | CSP8    | <i>C. peregrinus</i> | <i>L. martiniquensis</i> 770605_Trang (KY982650), 100%   |

|     |                                     |          |                          |       |                            |                                                          |
|-----|-------------------------------------|----------|--------------------------|-------|----------------------------|----------------------------------------------------------|
| 4.  | Sadao/2 <sup>nd</sup> patient house | OP698054 | <i>L. martiniquensis</i> | CSP9  | <i>C. peregrinus</i>       | <i>L. martiniquensis</i> 770605_Trang (KY982650), 98.84% |
| 5.  | Sadao/2 <sup>nd</sup> patient house | OP698055 | <i>L. martiniquensis</i> | CSP11 | <i>C. peregrinus</i>       | <i>L. martiniquensis</i> 770605_Trang (KY982650), 99.61% |
| 6.  | Sadao/2 <sup>nd</sup> patient house | OP698056 | <i>L. orientalis</i>     | CSP12 | <i>C. peregrinus</i>       | <i>L. orientalis</i> 378_Trang (KY982674), 100%          |
| 7.  | Sadao/2 <sup>nd</sup> patient house | OP698057 | <i>L. martiniquensis</i> | CSP15 | <i>C. peregrinus</i>       | <i>L. martiniquensis</i> 770605_Trang (KY982650), 99.61% |
| 8.  | Sadao/2 <sup>nd</sup> patient house | OP698058 | <i>L. martiniquensis</i> | CSP35 | <i>C. oxystoma</i>         | <i>L. martiniquensis</i> SK4-1 (MK603826), 99.61%        |
| 9.  | Sadao/2 <sup>nd</sup> patient house | OP698059 | <i>L. orientalis</i>     | CSP38 | <i>C. oxystoma</i>         | <i>L. orientalis</i> 378_Trang (KY982674), 98%           |
| 10. | Sadao/2 <sup>nd</sup> patient house | OP698060 | <i>L. martiniquensis</i> | CSP41 | <i>C. oxystoma</i>         | <i>L. martiniquensis</i> 770605_Trang (KY982650), 98.84% |
| 11. | Sadao/2 <sup>nd</sup> patient house | OP698061 | <i>L. martiniquensis</i> | CSP42 | <i>C. oxystoma</i>         | <i>L. martiniquensis</i> 770605_Trang (KY982650), 99.61% |
| 12. | Sadao/2 <sup>nd</sup> patient house | OP698062 | <i>L. martiniquensis</i> | CSP44 | <i>C. oxystoma</i>         | <i>L. martiniquensis</i> 770605_Trang (KY982650), 99.61% |
| 13. | Sadao/2 <sup>nd</sup> patient house | OP698063 | <i>L. martiniquensis</i> | CSP45 | <i>C. oxystoma</i>         | <i>L. martiniquensis</i> 770605_Trang (KY982650), 99.61% |
| 14. | Sadao/2 <sup>nd</sup> patient house | OP698064 | <i>L. martiniquensis</i> | CSP48 | <i>C. oxystoma</i>         | <i>L. martiniquensis</i> 770605_Trang (KY982650), 99.61% |
| 15. | Sadao/2 <sup>nd</sup> patient house | OP698065 | <i>L. martiniquensis</i> | CSP59 | <i>C. mahasarakhamense</i> | <i>L. martiniquensis</i> SK4-1 (MK603826), 100%          |
| 16. | Rattaphum/livestock sheds           | OP698066 | <i>L. martiniquensis</i> | CHH10 | <i>C. fordai</i>           | <i>L. martiniquensis</i> 770605_Trang (KY982650), 100%   |
| 17. | Rattaphum/livestock sheds           | OP698067 | <i>L. martiniquensis</i> | CHH45 | <i>C. fulvus</i>           | <i>L. martiniquensis</i> 770605_Trang (KY982650), 100%   |

**Table S3.** The BLASTn result of *Crithidia* SSU rRNA sequences derived from field-caught. Culicoides biting midges in this study.

| No. | Location                            | Accession no. | Parasite Identification | Isolate | Host species         | Top BLASTn Matches and % Similarity           |
|-----|-------------------------------------|---------------|-------------------------|---------|----------------------|-----------------------------------------------|
| 1.  | Sadao/2 <sup>nd</sup> patient house | OP698037      | <i>Crithidia</i> sp.    | CSP18   | <i>C. peregrinus</i> | <i>C. thermophila/confusa/deanei</i> , 97.21% |
| 2.  | Sadao/2 <sup>nd</sup> patient house | OP698038      | <i>Crithidia</i> sp.    | CSP20   | <i>C. peregrinus</i> | <i>C. thermophila/confusa/deanei</i> , 97.42% |
| 3.  | Sadao/2 <sup>nd</sup> patient house | OP698039      | <i>Crithidia</i> sp.    | CSP22   | <i>C. peregrinus</i> | <i>C. thermophila/confusa/deanei</i> , 96.78% |
| 4.  | Sadao/2 <sup>nd</sup> patient house | OP698040      | <i>Crithidia</i> sp.    | CSP25   | <i>C. peregrinus</i> | <i>C. thermophila/confusa/deanei</i> , 96.99% |
| 5.  | Sadao/2 <sup>nd</sup> patient house | OP698041      | <i>Crithidia</i> sp.    | CSP28   | <i>C. peregrinus</i> | <i>C. thermophila/confusa/deanei</i> , 97.31% |
| 6.  | Sadao/2 <sup>nd</sup> patient house | OP698042      | <i>Crithidia</i> sp.    | CSP30   | <i>C. peregrinus</i> | <i>C. thermophila/confusa/deanei</i> , 96.46% |
| 7.  | Sadao/2 <sup>nd</sup> patient house | OP698043      | <i>Crithidia</i> sp.    | CSP42   | <i>C. oxystoma</i>   | <i>C. thermophila/confusa/deanei</i> , 96.99% |

|     |                                     |          |                      |        |                      |                                               |
|-----|-------------------------------------|----------|----------------------|--------|----------------------|-----------------------------------------------|
| 8.  | Sadao/2 <sup>nd</sup> patient house | OP698044 | <i>Crithidia</i> sp. | CSP50  | <i>C. oxystoma</i>   | <i>C. thermophila/confusa/deanei</i> , 96.24% |
| 9.  | Rattaphum/livestock sheds           | OP698045 | <i>Crithidia</i> sp. | CHH64  | <i>C. fordae</i>     | <i>C. thermophila/confusa/deanei</i> , 97.31% |
| 10. | Rattaphum/livestock sheds           | OP698046 | <i>Crithidia</i> sp. | CHH65  | <i>C. fordae</i>     | <i>C. thermophila/confusa/deanei</i> , 96.89% |
| 11. | Rattaphum/livestock sheds           | OP698047 | <i>Crithidia</i> sp. | CHH95  | <i>C. orientalis</i> | <i>C. thermophila/confusa/deanei</i> , 96.89% |
| 12. | Rattaphum/livestock sheds           | OP698048 | <i>Crithidia</i> sp. | CHH113 | <i>C. elbeli</i>     | <i>C. thermophila/confusa/deanei</i> , 97.42% |

Accession nos of *C. thermophila/confusa/deanei* references were KY264937, JF717837, and EU079129, respectively.
